# Supplementary material
Source: HighWire-hosted journal article supplement (https://gut.bmj.com/content/72/6/1129)

# Figure S5

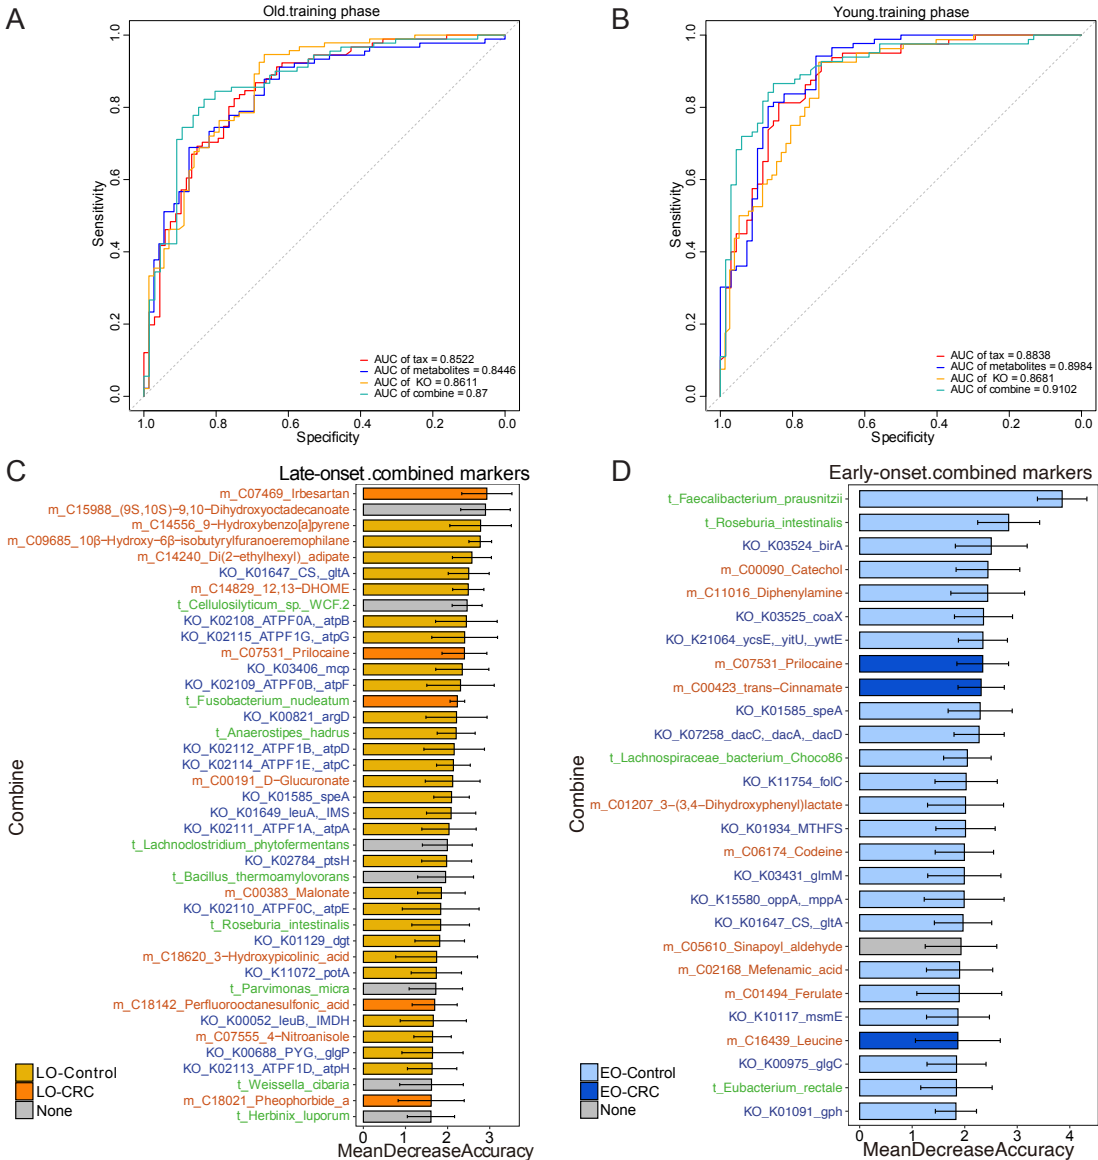

Supplement: inline-supplementary-material-6 [file inline-supplementary-material-6.pdf]
